# Supplementary material for: The elusive crystals of calcium acetate hemihydrate: chiral rods linked by parallel hydrophilic strips
Source: Royal Society of Chemistry journal article supplement (doi:10.1039/d0ce01590c), 2020-12-08
Supplement: d0ce01590c1.pdf [file d0ce01590c1.pdf]

# The elusive crystals of calcium acetate hemihydrate: chiral rods linked by parallel hydrophilic strips

Brendan F. Abrahams, Christopher J. Commons,\* Timothy A. Hudson, Robin W. Sanchez Arlt

School of Chemistry, University of Melbourne, Parkville, Victoria 3010, Australia.

\*To whom correspondence should be addressed. Email: christopher.common@unimelb.edu.au

## Electronic supplementary information

### Contents

|                                                                                                             |   |
|-------------------------------------------------------------------------------------------------------------|---|
| 1. XRPD data and discussion relating to the calcium acetate starting material .....                         | 2 |
| 2. Experimental details relating to alternative attempted synthetic procedures .....                        | 2 |
| 3. Figure S2: Asymmetric unit of calcium acetate hemihydrate .....                                          | 3 |
| 4. Table S1: Selected bond lengths for $\text{Ca}(\text{OAc})_2 \cdot \frac{1}{2} \text{H}_2\text{O}$ ..... | 4 |
| 5. Table S2: Selected bond angles for $\text{Ca}(\text{OAc})_2 \cdot \frac{1}{2} \text{H}_2\text{O}$ .....  | 5 |

## 1. XRPD data and discussion relating to the calcium acetate starting material

X-ray powder diffraction analysis was performed on the  $\text{Ca}(\text{OAc})_2 \cdot \text{H}_2\text{O}$  ( $\text{OAc}^- = \text{CH}_3\text{COO}^-$ ) to determine the purity of the starting material. As is apparent from inspection of Figure S1, there is a good match between the experimentally determined powder pattern (black) and the calculated pattern of the monohydrate (blue). There are some very small additional peaks in the experimentally determined powder pattern which match intense peaks in the calculated powder pattern of the hemihydrate (red). This is consistent with the presence of a trace quantity of the hemihydrate in the monohydrate sample. Inspection of the bulk monohydrate under a microscope failed to identify the block-like crystals of the type isolated from 1,4-dioxane, indicating that the original hemihydrate was present as a microcrystalline solid.

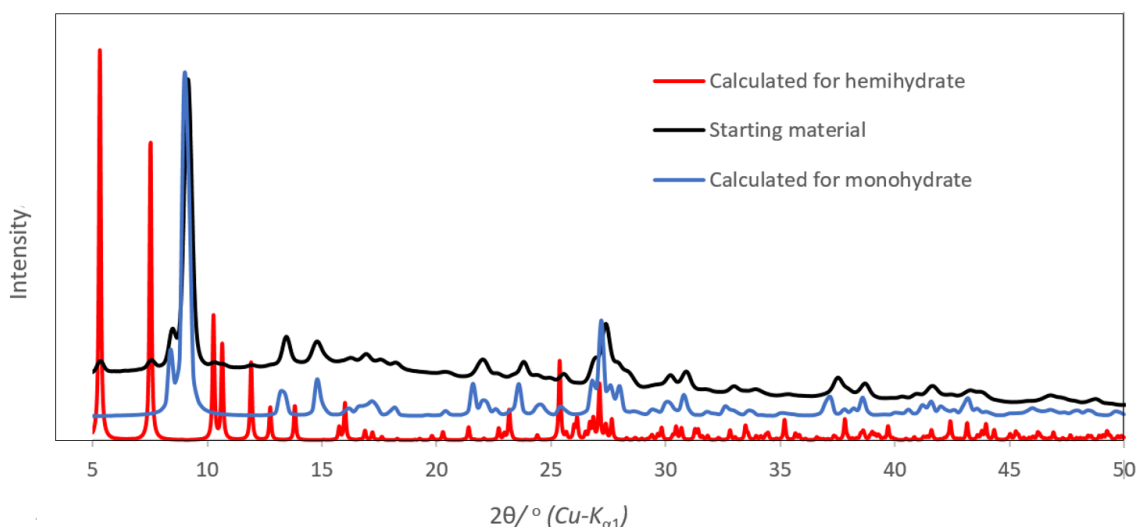

**Figure S1** Measured XRPD pattern of the starting material (black), measured at 100 K, and the calculated patterns of  $\text{Ca}(\text{OAc})_2 \cdot \text{H}_2\text{O}$  (blue) and  $\text{Ca}(\text{OAc})_2 \cdot \frac{1}{2}\text{H}_2\text{O}$  (red). Whilst the starting material is composed mainly of the monohydrate, trace amounts of the hemihydrate are present. The calculated pattern of  $\text{Ca}(\text{OAc})_2 \cdot \text{H}_2\text{O}$  is based on the room temperature structure reported by E. Klop *et al*, *Acta Crystallogr., Sect. C: Cryst. Struct. Commun.*, 1984, **40**, 51-53.

## 2. Experimental details relating to alternative attempted synthetic procedures

The formation of the hemihydrate in a 1,4-dioxane solution containing dissolved 4-hydroxybenzoic acid prompted an investigation to determine the importance of the 4-hydroxybenzoic acid in the generation of the hemihydrate crystals. The following reactions were performed to determine whether the hemihydrate could be formed under similar conditions that yielded  $\text{Ca}(\text{OAc})_2 \cdot \frac{1}{2}\text{H}_2\text{O}$  but in the absence of the 4-hydroxybenzoic acid or using different solvents.

- i) Benzoic acid (0.488 g, 4.00 mmol) was dissolved in 1,4-dioxane (8 mL) and added to a suspension of  $\text{Ca}(\text{OAc})_2 \cdot \text{H}_2\text{O}$  (0.316 g, 1.80 mmol) in 1,4-dioxane (4 mL).

ii) Phenol (0.376 g, 4.00 mmol) was dissolved in 1,4-dioxane (8 mL) and added to a suspension of  $\text{Ca}(\text{OAc})_2 \cdot \text{H}_2\text{O}$  (0.316 g, 1.80 mmol) in 1,4-dioxane (4 mL).

iii) 4-hydroxybenzoic acid (0.552 g, 4.00 mmol) was dissolved in methanol (8 mL) and added to a suspension of  $\text{Ca}(\text{OAc})_2 \cdot \text{H}_2\text{O}$  (0.316 g, 1.80 mmol) in methanol (4 mL).

iv) 4-hydroxybenzoic acid (0.552 g, 4.00 mmol) was dissolved in ethanol (8 mL) and added to a suspension of  $\text{Ca}(\text{OAc})_2 \cdot \text{H}_2\text{O}$  (0.316 g, 1.80 mmol) in ethanol (4 mL).

v) A suspension of  $\text{Ca}(\text{OAc})_2 \cdot \text{H}_2\text{O}$  (0.316 g, 1.80 mmol) was added to 1,4-dioxane (12 mL).

In each of the five cases indicated above, no usable single crystals of the hemihydrate were formed after 7 days.

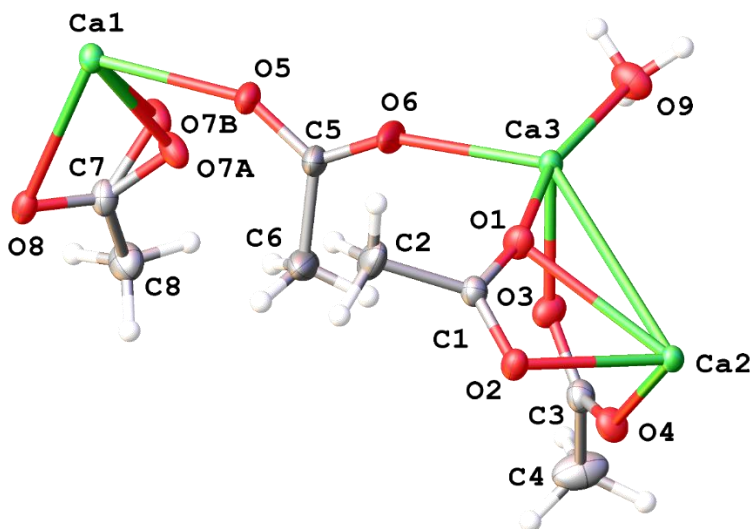

**3. Figure S2** Asymmetric unit of calcium acetate hemihydrate,  $\text{Ca}(\text{OAc})_2 \cdot \frac{1}{2}\text{H}_2\text{O}$  ( $\text{OAc} = \text{CH}_3\text{COO}$ ), showing the labelling scheme and 50% probability displacement ellipsoids. Oxygen O7 is disordered between two positions, O7A and O7B. The hydrogen atoms on each coordinated water molecule are disordered between three positions which align with the directions to the closest oxygen atoms. One of the neighbours of the oxygen atom of the coordinated water (labelled O9) is a symmetry-related O9 on a neighbouring rod ( $\text{O9} \cdots \text{O9}$  distance 2.932 Å). The hydrogen atom bonded to the oxygen oriented along this direction must therefore have a maximum occupancy of 0.5.

**4. Table S1** Selected bond lengths for  $\text{Ca}(\text{OAc})_2 \cdot \frac{1}{2}\text{H}_2\text{O}$ .

| Atoms |                  | Length/Å   | Atoms |                   | Length/Å   |
|-------|------------------|------------|-------|-------------------|------------|
| C1    | C2               | 1.504(3)   | Ca1   | O7B               | 2.448(7)   |
| C1    | O1               | 1.258(2)   | Ca1   | O8                | 2.7898(14) |
| C1    | O2               | 1.262(2)   | Ca2   | Ca3               | 3.7861(4)  |
| C3    | C4               | 1.512(3)   | Ca2   | O1                | 2.6203(14) |
| C3    | O3               | 1.258(2)   | Ca2   | O2                | 2.4839(13) |
| C3    | O4               | 1.256(2)   | Ca2   | O4                | 2.3060(13) |
| C5    | C6               | 1.498(3)   | Ca2   | O8 <sup>II</sup>  | 2.4447(12) |
| C5    | O5               | 1.263(2)   | Ca3   | Ca3 <sup>I</sup>  | 4.0415(7)  |
| C5    | O6               | 1.255(3)   | Ca3   | O9                | 2.3765(14) |
| C7    | C8               | 1.495(3)   | Ca3   | O1                | 2.2958(13) |
| C7    | O7A              | 1.251(7)   | Ca3   | O3                | 2.3111(14) |
| C7    | O7B              | 1.307(12)  | Ca3   | O5 <sup>I</sup>   | 2.4846(14) |
| C7    | O8               | 1.264(2)   | Ca3   | O6 <sup>I</sup>   | 2.5236(16) |
| Ca1   | O2 <sup>II</sup> | 2.3758(13) | Ca3   | O6                | 2.3459(16) |
| Ca1   | O5               | 2.3568(14) | Ca3   | O8 <sup>III</sup> | 2.4394(13) |
| Ca1   | O7A              | 2.464(7)   |       |                   |            |

<sup>I</sup>3/2-X,+Y,1-Z; <sup>II</sup>1/4+Y,-1/4+X,3/4-Z; <sup>III</sup>+X,+Y,1+Z

**5. Table S2** Selected bond angles for  $\text{Ca}(\text{OAc})_2 \cdot \frac{1}{2}\text{H}_2\text{O}$ .

| Atoms             |     |                   | Angle/°    | Atoms             |     |                   | Angle/°   |
|-------------------|-----|-------------------|------------|-------------------|-----|-------------------|-----------|
| O4                | Ca2 | O1 <sup>V</sup>   | 157.27(4)  | O5                | Ca1 | O7B               | 85.9(6)   |
| O4                | Ca2 | O1                | 84.15(4)   | O4                | Ca2 | O8 <sup>VI</sup>  | 81.41(5)  |
| O4                | Ca2 | O2 <sup>V</sup>   | 151.84(4)  | O4 <sup>V</sup>   | Ca2 | O8 <sup>VI</sup>  | 85.70(4)  |
| O4                | Ca2 | O2                | 96.78(5)   | O8 <sup>VI</sup>  | Ca2 | O1                | 71.89(4)  |
| O4 <sup>V</sup>   | Ca2 | O4                | 88.91(7)   | O8 <sup>VI</sup>  | Ca2 | O1 <sup>V</sup>   | 119.44(4) |
| O4                | Ca2 | O8 <sup>IV</sup>  | 85.70(5)   | O8 <sup>IV</sup>  | Ca2 | O2 <sup>V</sup>   | 122.38(4) |
| O9                | Ca3 | O5 <sup>I</sup>   | 81.86(5)   | O8 <sup>VI</sup>  | Ca2 | O2 <sup>V</sup>   | 71.61(4)  |
| O2 <sup>III</sup> | Ca1 | O2 <sup>IV</sup>  | 84.08(6)   | O8 <sup>IV</sup>  | Ca2 | O8 <sup>VI</sup>  | 161.91(7) |
| O2 <sup>IV</sup>  | Ca1 | O7A <sup>II</sup> | 175.4(6)   | O1                | Ca3 | O8 <sup>VI</sup>  | 77.83(5)  |
| O2 <sup>III</sup> | Ca1 | O7A <sup>II</sup> | 94.5(5)    | O9                | Ca3 | O6 <sup>I</sup>   | 80.43(6)  |
| O2 <sup>III</sup> | Ca1 | O7B               | 169.7(8)   | O9                | Ca3 | O8 <sup>VI</sup>  | 86.44(5)  |
| O2 <sup>IV</sup>  | Ca1 | O7B               | 105.3(6)   | O1                | Ca3 | O9                | 162.98(6) |
| O2 <sup>III</sup> | Ca1 | O8 <sup>II</sup>  | 67.32(4)   | O1                | Ca3 | O3                | 92.47(5)  |
| O2 <sup>IV</sup>  | Ca1 | O8 <sup>II</sup>  | 134.27(4)  | O1                | Ca3 | O5 <sup>I</sup>   | 87.22(5)  |
| O5 <sup>II</sup>  | Ca1 | O2 <sup>III</sup> | 83.20(5)   | O1                | Ca3 | O6 <sup>I</sup>   | 102.88(6) |
| O5                | Ca1 | O2 <sup>III</sup> | 99.71(5)   | O1                | Ca3 | O6                | 101.43(6) |
| O5                | Ca1 | O5 <sup>II</sup>  | 176.12(8)  | O5                | Ca1 | O7B <sup>II</sup> | 90.9(6)   |
| O5                | Ca1 | O7A <sup>II</sup> | 101.3(5)   | O5 <sup>II</sup>  | Ca1 | O8 <sup>II</sup>  | 110.80(4) |
| O5                | Ca1 | O7A               | 75.8(5)    | O5 <sup>II</sup>  | Ca1 | O8                | 68.33(4)  |
| O5 <sup>II</sup>  | Ca1 | O7B               | 90.9(6)    | O7A <sup>II</sup> | Ca1 | O7A               | 87.3(11)  |
| O7A               | Ca1 | O8 <sup>II</sup>  | 111.18(18) | O6                | Ca3 | O9                | 95.24(7)  |

| Atoms             |     |                  |           | Angle/°             |     |                     |           | Atoms               |     |                     |           | Angle/°             |     |                     |           |
|-------------------|-----|------------------|-----------|---------------------|-----|---------------------|-----------|---------------------|-----|---------------------|-----------|---------------------|-----|---------------------|-----------|
| O7A <sup>II</sup> | Ca1 | O8 <sup>II</sup> | 48.26(12) | O6                  | Ca3 | O5 <sup>I</sup>     | 118.25(5) | O6                  | Ca3 | O5 <sup>I</sup>     | 118.25(5) | O6                  | Ca3 | O6 <sup>I</sup>     | 67.02(7)  |
| O7B <sup>II</sup> | Ca1 | O7B              | 65.8(11)  | O6                  | Ca3 | O8 <sup>VI</sup>    | 169.23(5) | O6                  | Ca3 | O6 <sup>I</sup>     | 67.02(7)  | O6                  | Ca3 | O8 <sup>VI</sup>    | 169.23(5) |
| O7B               | Ca1 | O8 <sup>II</sup> | 107.4(3)  | O8 <sup>VI</sup>    | Ca3 | O5 <sup>I</sup>     | 72.51(5)  | O8 <sup>VI</sup>    | Ca3 | O5 <sup>I</sup>     | 72.51(5)  | O8 <sup>VI</sup>    | Ca3 | O5 <sup>I</sup>     | 72.51(5)  |
| O7B <sup>II</sup> | Ca1 | O8 <sup>II</sup> | 49.3(2)   | Ca1 <sup>VII</sup>  | O2  | Ca2                 | 116.76(5) | Ca1 <sup>VII</sup>  | O2  | Ca2                 | 116.76(5) | Ca1 <sup>VII</sup>  | O2  | Ca2                 | 116.76(5) |
| O8                | Ca1 | O8 <sup>II</sup> | 155.72(5) | O2 <sup>V</sup>     | Ca2 | O1                  | 80.03(4)  | O2 <sup>V</sup>     | Ca2 | O1                  | 80.03(4)  | O2 <sup>V</sup>     | Ca2 | O1                  | 80.03(4)  |
| O1 <sup>V</sup>   | Ca2 | O1               | 109.84(6) | O2 <sup>V</sup>     | Ca2 | O1 <sup>V</sup>     | 50.82(4)  | O2 <sup>V</sup>     | Ca2 | O1 <sup>V</sup>     | 50.82(4)  | O2 <sup>V</sup>     | Ca2 | O1 <sup>V</sup>     | 50.82(4)  |
| O8 <sup>VI</sup>  | Ca3 | O6 <sup>I</sup>  | 123.72(5) | O2                  | Ca2 | O2 <sup>V</sup>     | 91.11(6)  | O2                  | Ca2 | O2 <sup>V</sup>     | 91.11(6)  | O2                  | Ca2 | O2 <sup>V</sup>     | 91.11(6)  |
| Ca3               | O1  | Ca2              | 100.52(5) | Ca1                 | O5  | Ca3 <sup>I</sup>    | 115.51(5) | Ca1                 | O5  | Ca3 <sup>I</sup>    | 115.51(5) | Ca1                 | O5  | Ca3 <sup>I</sup>    | 115.51(5) |
| O3                | Ca3 | O9               | 91.77(5)  | Ca3                 | O6  | Ca3 <sup>I</sup>    | 112.14(6) | Ca3                 | O6  | Ca3 <sup>I</sup>    | 112.14(6) | Ca3                 | O6  | Ca3 <sup>I</sup>    | 112.14(6) |
| O3                | Ca3 | O5 <sup>I</sup>  | 154.22(5) | Ca2 <sup>VIII</sup> | O8  | Ca1                 | 104.30(5) | Ca2 <sup>VIII</sup> | O8  | Ca1                 | 104.30(5) | Ca2 <sup>VIII</sup> | O8  | Ca1                 | 104.30(5) |
| O3                | Ca3 | O6 <sup>I</sup>  | 151.89(5) | Ca3 <sup>VIII</sup> | O8  | Ca1                 | 102.90(5) | Ca3 <sup>VIII</sup> | O8  | Ca1                 | 102.90(5) | Ca3 <sup>VIII</sup> | O8  | Ca1                 | 102.90(5) |
| O3                | Ca3 | O6               | 87.09(5)  | Ca3 <sup>VIII</sup> | O8  | Ca2 <sup>VIII</sup> | 101.65(5) | Ca3 <sup>VIII</sup> | O8  | Ca2 <sup>VIII</sup> | 101.65(5) | Ca3 <sup>VIII</sup> | O8  | Ca2 <sup>VIII</sup> | 101.65(5) |
| O3                | Ca3 | O8 <sup>VI</sup> | 82.22(5)  |                     |     |                     |           |                     |     |                     |           |                     |     |                     |           |
| O5 <sup>I</sup>   | Ca3 | O6 <sup>I</sup>  | 51.59(5)  |                     |     |                     |           |                     |     |                     |           |                     |     |                     |           |

<sup>I</sup>3/2-X,+Y,1-Z; <sup>II</sup>3/2-X,+Y,-Z; <sup>III</sup>5/4-Y,-1/4+X,-3/4+Z; <sup>IV</sup>1/4+Y,-1/4+X,3/4-Z; <sup>V</sup>1/4+Y,-1/4+X,7/4-Z; <sup>VI</sup>+X,+Y,1+Z; <sup>VII</sup>1/4+Y,5/4-X,3/4+Z; <sup>VIII</sup>+X,+Y,-1+Z
